# Supplementary material for: Unearthing soil arthropod diversity through DNA metabarcoding
Source: PeerJ journal article supplement (doi:10.7717/peerj.12845), 2022-02-01
Supplement: Fig_S1_65967_JT_staff.pdf [file Fig_S1_65967_JT_staff.pdf]

**OF1**

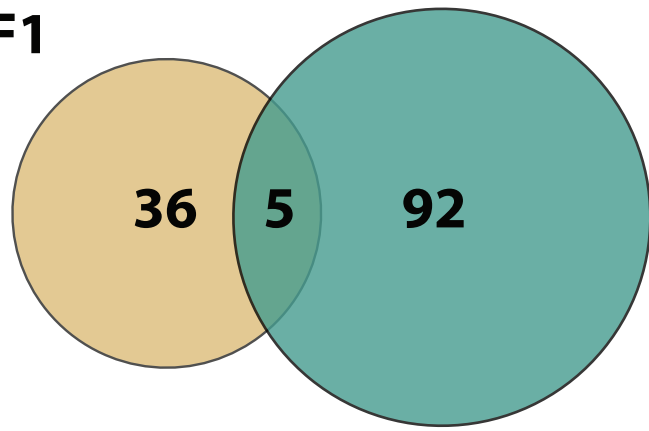

**OF2**

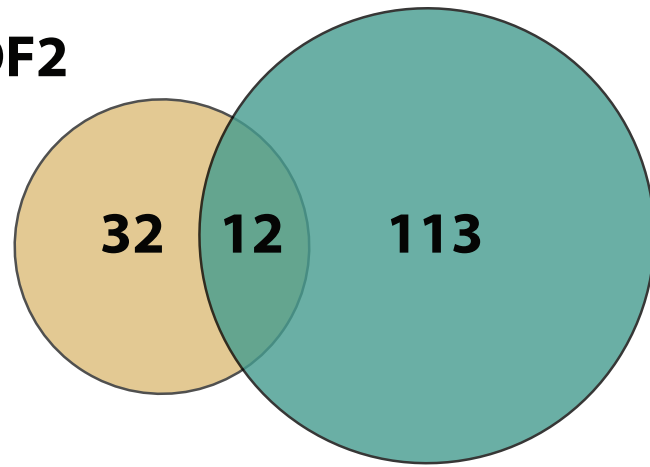

**OM1**

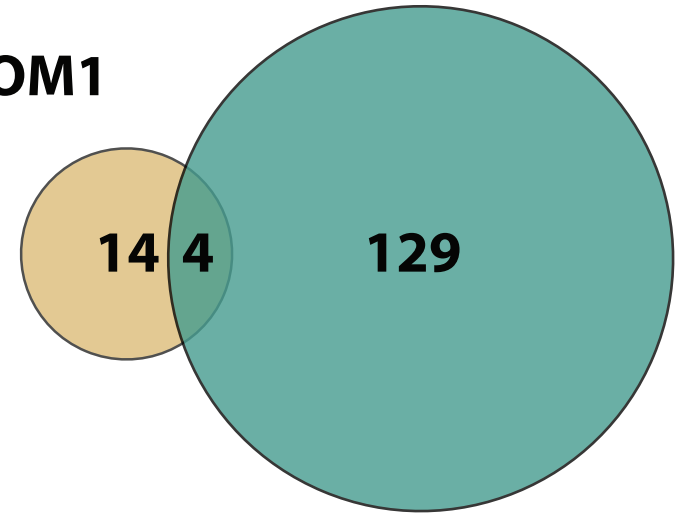

**All taxa**

---

**OF1**

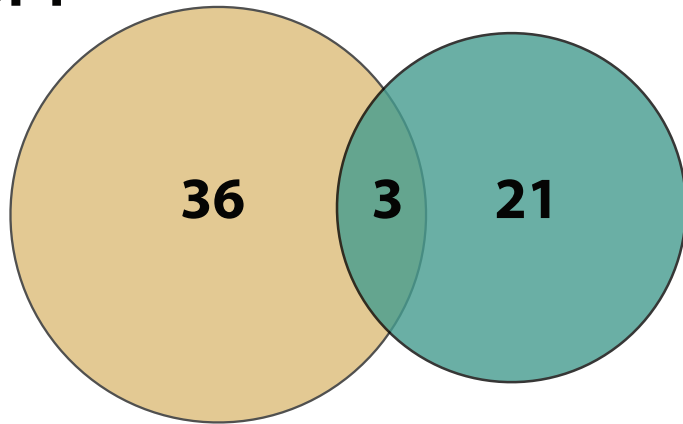

**OF2**

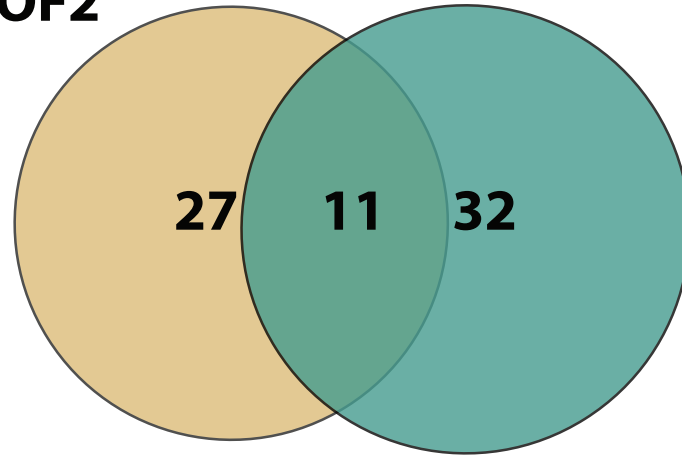

**OM1**

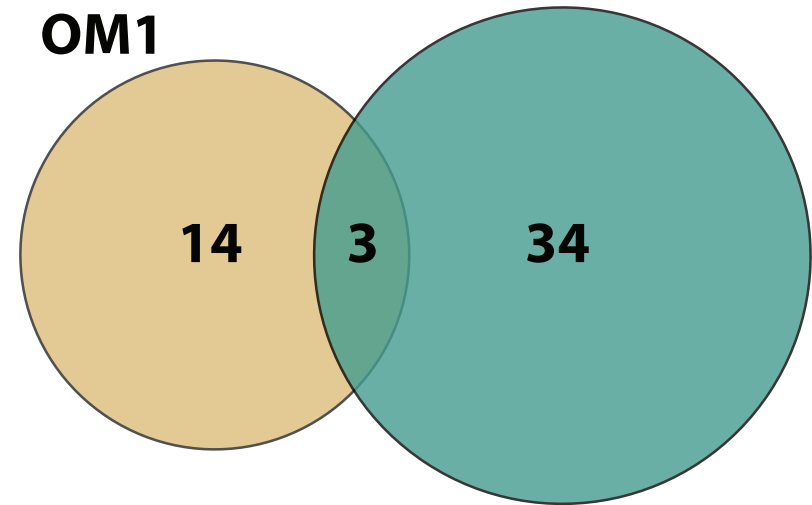

**Arthropods**

---

**OF1**

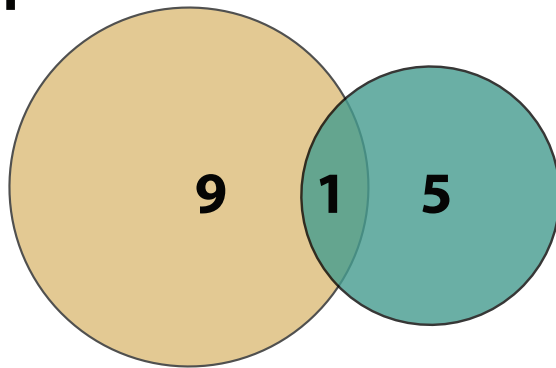

**OF2**

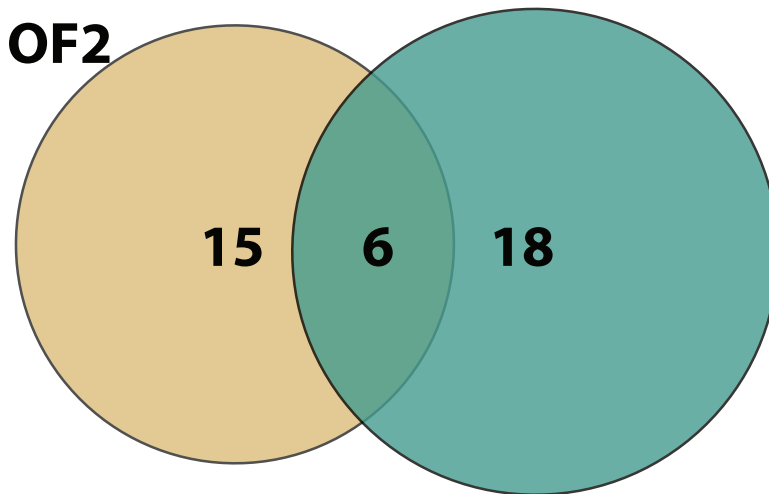

**OM1**

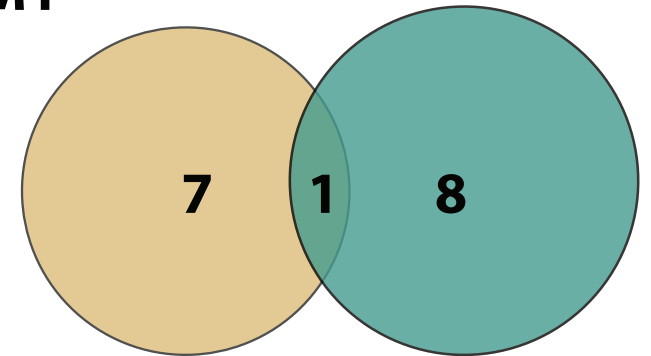

**Mites**

Protocol: ● Specimens ● Soil
