# Supplementary material for: Unearthing soil arthropod diversity through DNA metabarcoding
Source: PeerJ journal article supplement (doi:10.7717/peerj.12845), 2022-02-01

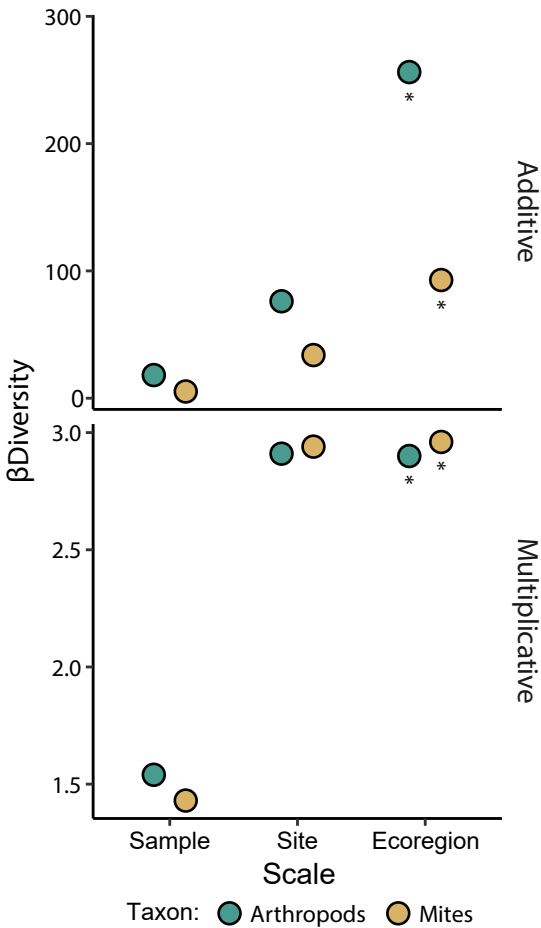

Supplement: Fig_S2_65967_JT_staff.pdf [file Fig_S2_65967_JT_staff.pdf]
