# Supplementary material for: Unearthing soil arthropod diversity through DNA metabarcoding
Source: PeerJ. 2022 Feb 1;10:e12845. doi: 10.7717/peerj.12845 (PMC8815377; doi:10.7717/peerj.12845)
Supplement: Supplemental Information 1 [file peerj-10-12845-s001.xlsx]

## Sheet: Sheet1
Supplementary Table 1: Collection details for 22 soil samples collected from 11 sites across Canada including three used for specimen and 19 for soil DNA metabarcode analysis.
Sample	Collector	Date	Country	Province	Sector	Site	Protocol	Habitat	Ecoregion	Latitude	Longitude
L#17RAREBB-006b	Monica Young	2017-07-15	Canada	Ontario	rare Charitable Research Reserve	OF1	Berlese-Tullgren	Forest	Eastern Temperate Forest	43.3742	-80.366
L#17RAREBB-006s	Monica Young	2017-07-15	Canada	Ontario	rare Charitable Research Reserve	OF1	Bulk Soil	Forest	Eastern Temperate Forest	43.3742	-80.366
L#17RAREBB-012b	Monica Young	2017-07-15	Canada	Ontario	rare Charitable Research Reserve	OM1	Berlese-Tullgren	Meadow	Eastern Temperate Forest	43.3833	-80.3714
L#17RAREBB-012s	Monica Young	2017-07-15	Canada	Ontario	rare Charitable Research Reserve	OM1	Bulk Soil	Meadow	Eastern Temperate Forest	43.3833	-80.3714
L#17RAREBB-016b	Monica Young	2017-07-15	Canada	Ontario	rare Charitable Research Reserve	OF2	Berlese-Tullgren	Forest	Eastern Temperate Forest	43.3785	-80.3427
L#17RAREBB-016s	Monica Young	2017-07-15	Canada	Ontario	rare Charitable Research Reserve	OF2	Bulk Soil	Forest	Eastern Temperate Forest	43.3785	-80.3427
L#C3NGS-0001s	Monica Young	2017-07-23	Canada	Newfoundland and Labrador	Nunatsiavut	L1	Bulk Soil	Tundra	Taiga/Arctic Cordillera	56.5465	-61.6849
L#C3NGS-0002s	Monica Young	2017-07-23	Canada	Newfoundland and Labrador	Nunatsiavut	L1	Bulk Soil	Tundra	Taiga/Arctic Cordillera	56.5465	-61.6849
L#C3NGS-0003s	Monica Young	2017-07-24	Canada	Newfoundland and Labrador	Nunatsiavut	L2	Bulk Soil	Tundra	Taiga/Arctic Cordillera	58.1961	-62.6254
L#C3NGS-0004s	Monica Young	2017-07-24	Canada	Newfoundland and Labrador	Nunatsiavut	L2	Bulk Soil	Tundra	Taiga/Arctic Cordillera	58.1961	-62.6254
L#C3NGS-0005s	Monica Young	2017-07-27	Canada	Newfoundland and Labrador	Nunatsiavut	L3	Bulk Soil	Tundra	Taiga/Arctic Cordillera	59.7778	-64.2604
L#C3NGS-0006s	Monica Young	2017-07-27	Canada	Newfoundland and Labrador	Nunatsiavut	L3	Bulk Soil	Tundra	Taiga/Arctic Cordillera	59.7778	-64.2604
L#1CHARSNGS-01s	Monica Young	2018-08-01	Canada	Nunavut	Vicinity of Cambridge Bay	V1	Bulk Soil	Tundra	Tundra	69.1323	-105.062
L#1CHARSNGS-02s	Monica Young	2018-08-01	Canada	Nunavut	Vicinity of Cambridge Bay	V1	Bulk Soil	Tundra	Tundra	69.1323	-105.062
L#1CHARSNGS-03s	Monica Young	2018-07-31	Canada	Nunavut	Vicinity of Cambridge Bay	V2	Bulk Soil	Tundra	Tundra	69.2187	-104.926
L#1CHARSNGS-04s	Monica Young	2018-07-31	Canada	Nunavut	Vicinity of Cambridge Bay	V2	Bulk Soil	Tundra	Tundra	69.2187	-104.926
L#1CHARSNGS-05s	Monica Young	2018-08-03	Canada	Nunavut	Vicinity of Cambridge Bay	V3	Bulk Soil	Tundra	Tundra	69.633	-110.328
L#1CHARSNGS-06s	Monica Young	2018-08-03	Canada	Nunavut	Vicinity of Cambridge Bay	V3	Bulk Soil	Tundra	Tundra	69.633	-110.328
L#1CHARSNGS-07s	Monica Young	2018-08-03	Canada	Nunavut	Vicinity of Cambridge Bay	V4	Bulk Soil	Tundra	Tundra	70.7396	-107.944
L#1CHARSNGS-08s	Monica Young	2018-08-03	Canada	Nunavut	Vicinity of Cambridge Bay	V4	Bulk Soil	Tundra	Tundra	70.7396	-107.944
L#1CHARSNGS-09s	Monica Young	2018-08-02	Canada	Nunavut	Vicinity of Cambridge Bay	V5	Bulk Soil	Tundra	Tundra	69.1121	-105.182
L#1CHARSNGS-10s	Monica Young	2018-08-02	Canada	Nunavut	Vicinity of Cambridge Bay	V5	Bulk Soil	Tundra	Tundra	69.1121	-105.182
