# Supplementary material for: Unearthing soil arthropod diversity through DNA metabarcoding
Source: PeerJ. 2022 Feb 1;10:e12845. doi: 10.7717/peerj.12845 (PMC8815377; doi:10.7717/peerj.12845)
Supplement: Supplemental Information 2 [file peerj-10-12845-s002.xlsx]

## Sheet: Sheet1
Supplementary Table 2: Summary of laboratory samples for the eight extraction replicates from each of 22 field samples and six laboratory controls.
Label	Sample	Replicate	Plate
BLANK_Neg1_Rep1	Neg1	1	CBGMB.00032
BLANK_Neg1_Rep2	Neg1	2	CBGMB.00032
BLANK_Neg1_Rep3	Neg1	3	CBGMB.00032
BLANK_Neg1_Rep4	Neg1	4	CBGMB.00032
BLANK_Neg1_Rep5	Neg1	5	CBGMB.00032
BLANK_Neg1_Rep6	Neg1	6	CBGMB.00032
BLANK_Neg1_Rep7	Neg1	7	CBGMB.00032
BLANK_Neg1_Rep8	Neg1	8	CBGMB.00032
GMP.07682_Pos1_Rep1	Pos1	1	CBGMB.00032
GMP.07682_Pos1_Rep2	Pos1	2	CBGMB.00032
GMP.07682_Pos1_Rep3	Pos1	3	CBGMB.00032
GMP.07682_Pos1_Rep4	Pos1	4	CBGMB.00032
GMP.07682_Pos1_Rep5	Pos1	5	CBGMB.00032
GMP.07682_Pos1_Rep6	Pos1	6	CBGMB.00032
GMP.07682_Pos1_Rep7	Pos1	7	CBGMB.00032
GMP.07682_Pos1_Rep8	Pos1	8	CBGMB.00032
L.17RAREBB.006b_Rep1	L#17RAREBB-006b	1	CBGMB.00032
L.17RAREBB.006b_Rep2	L#17RAREBB-006b	2	CBGMB.00032
L.17RAREBB.006b_Rep3	L#17RAREBB-006b	3	CBGMB.00032
L.17RAREBB.006b_Rep4	L#17RAREBB-006b	4	CBGMB.00032
L.17RAREBB.006b_Rep5	L#17RAREBB-006b	5	CBGMB.00032
L.17RAREBB.006b_Rep6	L#17RAREBB-006b	6	CBGMB.00032
L.17RAREBB.006b_Rep7	L#17RAREBB-006b	7	CBGMB.00032
L.17RAREBB.006b_Rep8	L#17RAREBB-006b	8	CBGMB.00032
L.17RAREBB.006s_Rep1	L#17RAREBB-006s	1	CBGMB.00032
L.17RAREBB.006s_Rep2	L#17RAREBB-006s	2	CBGMB.00032
L.17RAREBB.006s_Rep3	L#17RAREBB-006s	3	CBGMB.00032
L.17RAREBB.006s_Rep4	L#17RAREBB-006s	4	CBGMB.00032
L.17RAREBB.006s_Rep5	L#17RAREBB-006s	5	CBGMB.00032
L.17RAREBB.006s_Rep6	L#17RAREBB-006s	6	CBGMB.00032
L.17RAREBB.006s_Rep7	L#17RAREBB-006s	7	CBGMB.00032
L.17RAREBB.006s_Rep8	L#17RAREBB-006s	8	CBGMB.00032
L.17RAREBB.012b_Rep1	L#17RAREBB-012b	1	CBGMB.00032
L.17RAREBB.012b_Rep2	L#17RAREBB-012b	2	CBGMB.00032
L.17RAREBB.012b_Rep3	L#17RAREBB-012b	3	CBGMB.00032
L.17RAREBB.012b_Rep4	L#17RAREBB-012b	4	CBGMB.00032
L.17RAREBB.012b_Rep5	L#17RAREBB-012b	5	CBGMB.00032
L.17RAREBB.012b_Rep6	L#17RAREBB-012b	6	CBGMB.00032
L.17RAREBB.012b_Rep7	L#17RAREBB-012b	7	CBGMB.00032
L.17RAREBB.012b_Rep8	L#17RAREBB-012b	8	CBGMB.00032
L.17RAREBB.012s_Rep1	L#17RAREBB-012s	1	CBGMB.00032
L.17RAREBB.012s_Rep2	L#17RAREBB-012s	2	CBGMB.00032
L.17RAREBB.012s_Rep3	L#17RAREBB-012s	3	CBGMB.00032
L.17RAREBB.012s_Rep4	L#17RAREBB-012s	4	CBGMB.00032
L.17RAREBB.012s_Rep5	L#17RAREBB-012s	5	CBGMB.00032
L.17RAREBB.012s_Rep6	L#17RAREBB-012s	6	CBGMB.00032
L.17RAREBB.012s_Rep7	L#17RAREBB-012s	7	CBGMB.00032
L.17RAREBB.012s_Rep8	L#17RAREBB-012s	8	CBGMB.00032
L.17RAREBB.016b_Rep1	L#17RAREBB-016b	1	CBGMB.00032
L.17RAREBB.016b_Rep2	L#17RAREBB-016b	2	CBGMB.00032
L.17RAREBB.016b_Rep3	L#17RAREBB-016b	3	CBGMB.00032
L.17RAREBB.016b_Rep4	L#17RAREBB-016b	4	CBGMB.00032
L.17RAREBB.016b_Rep5	L#17RAREBB-016b	5	CBGMB.00032
L.17RAREBB.016b_Rep6	L#17RAREBB-016b	6	CBGMB.00032
L.17RAREBB.016b_Rep7	L#17RAREBB-016b	7	CBGMB.00032
L.17RAREBB.016b_Rep8	L#17RAREBB-016b	8	CBGMB.00032
L.17RAREBB.016s_Rep1	L#17RAREBB-016s	1	CBGMB.00032
L.17RAREBB.016s_Rep2	L#17RAREBB-016s	2	CBGMB.00032
L.17RAREBB.016s_Rep3	L#17RAREBB-016s	3	CBGMB.00032
L.17RAREBB.016s_Rep4	L#17RAREBB-016s	4	CBGMB.00032
L.17RAREBB.016s_Rep5	L#17RAREBB-016s	5	CBGMB.00032
L.17RAREBB.016s_Rep6	L#17RAREBB-016s	6	CBGMB.00032
L.17RAREBB.016s_Rep7	L#17RAREBB-016s	7	CBGMB.00032
L.17RAREBB.016s_Rep8	L#17RAREBB-016s	8	CBGMB.00032
BLANK_Neg2_Rep1	Neg2	1	CBGMB.00083
BLANK_Neg2_Rep2	Neg2	2	CBGMB.00083
BLANK_Neg2_Rep3	Neg2	3	CBGMB.00083
BLANK_Neg2_Rep4	Neg2	4	CBGMB.00083
BLANK_Neg2_Rep5	Neg2	5	CBGMB.00083
BLANK_Neg2_Rep6	Neg2	6	CBGMB.00083
BLANK_Neg2_Rep7	Neg2	7	CBGMB.00083
BLANK_Neg2_Rep8	Neg2	8	CBGMB.00083
GMP.07682_Pos2_Rep1	Pos2	1	CBGMB.00083
GMP.07682_Pos2_Rep2	Pos2	2	CBGMB.00083
GMP.07682_Pos2_Rep3	Pos2	3	CBGMB.00083
GMP.07682_Pos2_Rep4	Pos2	4	CBGMB.00083
GMP.07682_Pos2_Rep5	Pos2	5	CBGMB.00083
GMP.07682_Pos2_Rep6	Pos2	6	CBGMB.00083
GMP.07682_Pos2_Rep7	Pos2	7	CBGMB.00083
GMP.07682_Pos2_Rep8	Pos2	8	CBGMB.00083
L.C3NGS.0001s_Rep1	L#C3NGS-0001s	1	CBGMB.00083
L.C3NGS.0001s_Rep2	L#C3NGS-0001s	2	CBGMB.00083
L.C3NGS.0001s_Rep3	L#C3NGS-0001s	3	CBGMB.00083
L.C3NGS.0001s_Rep4	L#C3NGS-0001s	4	CBGMB.00083
L.C3NGS.0001s_Rep5	L#C3NGS-0001s	5	CBGMB.00083
L.C3NGS.0001s_Rep6	L#C3NGS-0001s	6	CBGMB.00083
L.C3NGS.0001s_Rep7	L#C3NGS-0001s	7	CBGMB.00083
L.C3NGS.0001s_Rep8	L#C3NGS-0001s	8	CBGMB.00083
L.C3NGS.0002s_Rep1	L#C3NGS-0002s	1	CBGMB.00083
L.C3NGS.0002s_Rep2	L#C3NGS-0002s	2	CBGMB.00083
L.C3NGS.0002s_Rep3	L#C3NGS-0002s	3	CBGMB.00083
L.C3NGS.0002s_Rep4	L#C3NGS-0002s	4	CBGMB.00083
L.C3NGS.0002s_Rep5	L#C3NGS-0002s	5	CBGMB.00083
L.C3NGS.0002s_Rep6	L#C3NGS-0002s	6	CBGMB.00083
L.C3NGS.0002s_Rep7	L#C3NGS-0002s	7	CBGMB.00083
L.C3NGS.0002s_Rep8	L#C3NGS-0002s	8	CBGMB.00083
L.C3NGS.0003s_Rep1	L#C3NGS-0003s	1	CBGMB.00083
L.C3NGS.0003s_Rep2	L#C3NGS-0003s	2	CBGMB.00083
L.C3NGS.0003s_Rep3	L#C3NGS-0003s	3	CBGMB.00083
L.C3NGS.0003s_Rep4	L#C3NGS-0003s	4	CBGMB.00083
L.C3NGS.0003s_Rep5	L#C3NGS-0003s	5	CBGMB.00083
L.C3NGS.0003s_Rep6	L#C3NGS-0003s	6	CBGMB.00083
L.C3NGS.0003s_Rep7	L#C3NGS-0003s	7	CBGMB.00083
L.C3NGS.0003s_Rep8	L#C3NGS-0003s	8	CBGMB.00083
L.C3NGS.0004s_Rep1	L#C3NGS-0004s	1	CBGMB.00083
L.C3NGS.0004s_Rep2	L#C3NGS-0004s	2	CBGMB.00083
L.C3NGS.0004s_Rep3	L#C3NGS-0004s	3	CBGMB.00083
L.C3NGS.0004s_Rep4	L#C3NGS-0004s	4	CBGMB.00083
L.C3NGS.0004s_Rep5	L#C3NGS-0004s	5	CBGMB.00083
L.C3NGS.0004s_Rep6	L#C3NGS-0004s	6	CBGMB.00083
L.C3NGS.0004s_Rep7	L#C3NGS-0004s	7	CBGMB.00083
L.C3NGS.0004s_Rep8	L#C3NGS-0004s	8	CBGMB.00083
L.C3NGS.0005s_Rep1	L#C3NGS-0005s	1	CBGMB.00083
L.C3NGS.0005s_Rep2	L#C3NGS-0005s	2	CBGMB.00083
L.C3NGS.0005s_Rep3	L#C3NGS-0005s	3	CBGMB.00083
L.C3NGS.0005s_Rep4	L#C3NGS-0005s	4	CBGMB.00083
L.C3NGS.0005s_Rep5	L#C3NGS-0005s	5	CBGMB.00083
L.C3NGS.0005s_Rep6	L#C3NGS-0005s	6	CBGMB.00083
L.C3NGS.0005s_Rep7	L#C3NGS-0005s	7	CBGMB.00083
L.C3NGS.0005s_Rep8	L#C3NGS-0005s	8	CBGMB.00083
L.C3NGS.0006s_Rep1	L#C3NGS-0006s	1	CBGMB.00083
L.C3NGS.0006s_Rep2	L#C3NGS-0006s	2	CBGMB.00083
L.C3NGS.0006s_Rep3	L#C3NGS-0006s	3	CBGMB.00083
L.C3NGS.0006s_Rep4	L#C3NGS-0006s	4	CBGMB.00083
L.C3NGS.0006s_Rep5	L#C3NGS-0006s	5	CBGMB.00083
L.C3NGS.0006s_Rep6	L#C3NGS-0006s	6	CBGMB.00083
L.C3NGS.0006s_Rep7	L#C3NGS-0006s	7	CBGMB.00083
L.C3NGS.0006s_Rep8	L#C3NGS-0006s	8	CBGMB.00083
BLANK_Neg3_Rep1	Neg3	1	CBGMB.00135
BLANK_Neg3_Rep2	Neg3	2	CBGMB.00135
BLANK_Neg3_Rep3	Neg3	3	CBGMB.00135
BLANK_Neg3_Rep4	Neg3	4	CBGMB.00135
BLANK_Neg3_Rep5	Neg3	5	CBGMB.00135
BLANK_Neg3_Rep6	Neg3	6	CBGMB.00135
BLANK_Neg3_Rep7	Neg3	7	CBGMB.00135
BLANK_Neg3_Rep8	Neg3	8	CBGMB.00135
GMP.07682_Pos3_Rep1	Pos3	1	CBGMB.00135
GMP.07682_Pos3_Rep2	Pos3	2	CBGMB.00135
GMP.07682_Pos3_Rep3	Pos3	3	CBGMB.00135
GMP.07682_Pos3_Rep4	Pos3	4	CBGMB.00135
GMP.07682_Pos3_Rep5	Pos3	5	CBGMB.00135
GMP.07682_Pos3_Rep6	Pos3	6	CBGMB.00135
GMP.07682_Pos3_Rep7	Pos3	7	CBGMB.00135
GMP.07682_Pos3_Rep8	Pos3	8	CBGMB.00135
L.1CHARSNGS.01s_Rep1	L#1CHARSNGS-01s	1	CBGMB.00135
L.1CHARSNGS.01s_Rep2	L#1CHARSNGS-01s	2	CBGMB.00135
L.1CHARSNGS.01s_Rep3	L#1CHARSNGS-01s	3	CBGMB.00135
L.1CHARSNGS.01s_Rep4	L#1CHARSNGS-01s	4	CBGMB.00135
L.1CHARSNGS.01s_Rep5	L#1CHARSNGS-01s	5	CBGMB.00135
L.1CHARSNGS.01s_Rep6	L#1CHARSNGS-01s	6	CBGMB.00135
L.1CHARSNGS.01s_Rep7	L#1CHARSNGS-01s	7	CBGMB.00135
L.1CHARSNGS.01s_Rep8	L#1CHARSNGS-01s	8	CBGMB.00135
L.1CHARSNGS.02s_Rep1	L#1CHARSNGS-02s	1	CBGMB.00135
L.1CHARSNGS.02s_Rep2	L#1CHARSNGS-02s	2	CBGMB.00135
L.1CHARSNGS.02s_Rep3	L#1CHARSNGS-02s	3	CBGMB.00135
L.1CHARSNGS.02s_Rep4	L#1CHARSNGS-02s	4	CBGMB.00135
L.1CHARSNGS.02s_Rep5	L#1CHARSNGS-02s	5	CBGMB.00135
L.1CHARSNGS.02s_Rep6	L#1CHARSNGS-02s	6	CBGMB.00135
L.1CHARSNGS.02s_Rep7	L#1CHARSNGS-02s	7	CBGMB.00135
L.1CHARSNGS.02s_Rep8	L#1CHARSNGS-02s	8	CBGMB.00135
L.1CHARSNGS.03s_Rep1	L#1CHARSNGS-03s	1	CBGMB.00135
L.1CHARSNGS.03s_Rep2	L#1CHARSNGS-03s	2	CBGMB.00135
L.1CHARSNGS.03s_Rep3	L#1CHARSNGS-03s	3	CBGMB.00135
L.1CHARSNGS.03s_Rep4	L#1CHARSNGS-03s	4	CBGMB.00135
L.1CHARSNGS.03s_Rep5	L#1CHARSNGS-03s	5	CBGMB.00135
L.1CHARSNGS.03s_Rep6	L#1CHARSNGS-03s	6	CBGMB.00135
L.1CHARSNGS.03s_Rep7	L#1CHARSNGS-03s	7	CBGMB.00135
L.1CHARSNGS.03s_Rep8	L#1CHARSNGS-03s	8	CBGMB.00135
L.1CHARSNGS.04s_Rep1	L#1CHARSNGS-04s	1	CBGMB.00135
L.1CHARSNGS.04s_Rep2	L#1CHARSNGS-04s	2	CBGMB.00135
L.1CHARSNGS.04s_Rep3	L#1CHARSNGS-04s	3	CBGMB.00135
L.1CHARSNGS.04s_Rep4	L#1CHARSNGS-04s	4	CBGMB.00135
L.1CHARSNGS.04s_Rep5	L#1CHARSNGS-04s	5	CBGMB.00135
L.1CHARSNGS.04s_Rep6	L#1CHARSNGS-04s	6	CBGMB.00135
L.1CHARSNGS.04s_Rep7	L#1CHARSNGS-04s	7	CBGMB.00135
L.1CHARSNGS.04s_Rep8	L#1CHARSNGS-04s	8	CBGMB.00135
L.1CHARSNGS.05s_Rep1	L#1CHARSNGS-05s	1	CBGMB.00135
L.1CHARSNGS.05s_Rep2	L#1CHARSNGS-05s	2	CBGMB.00135
L.1CHARSNGS.05s_Rep3	L#1CHARSNGS-05s	3	CBGMB.00135
L.1CHARSNGS.05s_Rep4	L#1CHARSNGS-05s	4	CBGMB.00135
L.1CHARSNGS.05s_Rep5	L#1CHARSNGS-05s	5	CBGMB.00135
L.1CHARSNGS.05s_Rep6	L#1CHARSNGS-05s	6	CBGMB.00135
L.1CHARSNGS.05s_Rep7	L#1CHARSNGS-05s	7	CBGMB.00135
L.1CHARSNGS.05s_Rep8	L#1CHARSNGS-05s	8	CBGMB.00135
L.1CHARSNGS.06s_Rep1	L#1CHARSNGS-06s	1	CBGMB.00135
L.1CHARSNGS.06s_Rep2	L#1CHARSNGS-06s	2	CBGMB.00135
L.1CHARSNGS.06s_Rep3	L#1CHARSNGS-06s	3	CBGMB.00135
L.1CHARSNGS.06s_Rep4	L#1CHARSNGS-06s	4	CBGMB.00135
L.1CHARSNGS.06s_Rep5	L#1CHARSNGS-06s	5	CBGMB.00135
L.1CHARSNGS.06s_Rep6	L#1CHARSNGS-06s	6	CBGMB.00135
L.1CHARSNGS.06s_Rep7	L#1CHARSNGS-06s	7	CBGMB.00135
L.1CHARSNGS.06s_Rep8	L#1CHARSNGS-06s	8	CBGMB.00135
L.1CHARSNGS.07s_Rep1	L#1CHARSNGS-07s	1	CBGMB.00135
L.1CHARSNGS.07s_Rep2	L#1CHARSNGS-07s	2	CBGMB.00135
L.1CHARSNGS.07s_Rep3	L#1CHARSNGS-07s	3	CBGMB.00135
L.1CHARSNGS.07s_Rep4	L#1CHARSNGS-07s	4	CBGMB.00135
L.1CHARSNGS.07s_Rep5	L#1CHARSNGS-07s	5	CBGMB.00135
L.1CHARSNGS.07s_Rep6	L#1CHARSNGS-07s	6	CBGMB.00135
L.1CHARSNGS.07s_Rep7	L#1CHARSNGS-07s	7	CBGMB.00135
L.1CHARSNGS.07s_Rep8	L#1CHARSNGS-07s	8	CBGMB.00135
L.1CHARSNGS.08s_Rep1	L#1CHARSNGS-08s	1	CBGMB.00135
L.1CHARSNGS.08s_Rep2	L#1CHARSNGS-08s	2	CBGMB.00135
L.1CHARSNGS.08s_Rep3	L#1CHARSNGS-08s	3	CBGMB.00135
L.1CHARSNGS.08s_Rep4	L#1CHARSNGS-08s	4	CBGMB.00135
L.1CHARSNGS.08s_Rep5	L#1CHARSNGS-08s	5	CBGMB.00135
L.1CHARSNGS.08s_Rep6	L#1CHARSNGS-08s	6	CBGMB.00135
L.1CHARSNGS.08s_Rep7	L#1CHARSNGS-08s	7	CBGMB.00135
L.1CHARSNGS.08s_Rep8	L#1CHARSNGS-08s	8	CBGMB.00135
L.1CHARSNGS.09s_Rep1	L#1CHARSNGS-09s	1	CBGMB.00135
L.1CHARSNGS.09s_Rep2	L#1CHARSNGS-09s	2	CBGMB.00135
L.1CHARSNGS.09s_Rep3	L#1CHARSNGS-09s	3	CBGMB.00135
L.1CHARSNGS.09s_Rep4	L#1CHARSNGS-09s	4	CBGMB.00135
L.1CHARSNGS.09s_Rep5	L#1CHARSNGS-09s	5	CBGMB.00135
L.1CHARSNGS.09s_Rep6	L#1CHARSNGS-09s	6	CBGMB.00135
L.1CHARSNGS.09s_Rep7	L#1CHARSNGS-09s	7	CBGMB.00135
L.1CHARSNGS.09s_Rep8	L#1CHARSNGS-09s	8	CBGMB.00135
L.1CHARSNGS.10s_Rep1	L#1CHARSNGS-10s	1	CBGMB.00135
L.1CHARSNGS.10s_Rep2	L#1CHARSNGS-10s	2	CBGMB.00135
L.1CHARSNGS.10s_Rep3	L#1CHARSNGS-10s	3	CBGMB.00135
L.1CHARSNGS.10s_Rep4	L#1CHARSNGS-10s	4	CBGMB.00135
L.1CHARSNGS.10s_Rep5	L#1CHARSNGS-10s	5	CBGMB.00135
L.1CHARSNGS.10s_Rep6	L#1CHARSNGS-10s	6	CBGMB.00135
L.1CHARSNGS.10s_Rep7	L#1CHARSNGS-10s	7	CBGMB.00135
L.1CHARSNGS.10s_Rep8	L#1CHARSNGS-10s	8	CBGMB.00135
