# Supplementary material for: Unearthing soil arthropod diversity through DNA metabarcoding
Source: PeerJ. 2022 Feb 1;10:e12845. doi: 10.7717/peerj.12845 (PMC8815377; doi:10.7717/peerj.12845)
Supplement: Supplemental Information 5 [file peerj-10-12845-s005.xlsx]

## Sheet: Sheet1
Supplementary Table 5: Summary of morphologically identified specimens recovered from three DNA metabarcoded specimen samples following DNA extraction.
Sample	Phylum	Class	Order	Family	Notes	Abundance
RAREBB.006b	Annelida	Clitellata	Enchytraeida	Enchytraeidae	Adult	1
RAREBB.006b	Arthropoda	Arachnida	Araneae	Lycosidae	Adult	1
RAREBB.006b	Arthropoda	Arachnida	Mesostigmata	Pachylaelapidae	Adult	2
RAREBB.006b	Arthropoda	Arachnida	Mesostigmata	Parasitidae	Adult	3
RAREBB.006b	Arthropoda	Arachnida	Mesostigmata		Immature	2
RAREBB.006b	Arthropoda	Arachnida	Pseudoscorpiones	Neobisiidae	Adult	1
RAREBB.006b	Arthropoda	Arachnida	Sarcoptiformes	Astegistidae	Adult	1
RAREBB.006b	Arthropoda	Arachnida	Sarcoptiformes	Euphthiracaridae	Adult	1
RAREBB.006b	Arthropoda	Arachnida	Sarcoptiformes	Euzetidae	Adult	22
RAREBB.006b	Arthropoda	Arachnida	Sarcoptiformes	Galumnidae	Adult	4
RAREBB.006b	Arthropoda	Arachnida	Sarcoptiformes	Haplozetidae	Adult	7
RAREBB.006b	Arthropoda	Arachnida	Sarcoptiformes	Hypochthoniidae	Adult	1
RAREBB.006b	Arthropoda	Arachnida	Sarcoptiformes	Nanorchestes	Adult	1
RAREBB.006b	Arthropoda	Arachnida	Sarcoptiformes	Phthiracaridae	Adult	1
RAREBB.006b	Arthropoda	Arachnida	Sarcoptiformes		Immature	7
RAREBB.006b	Arthropoda	Arachnida	Trombidiformes	Eupodidae	Adult	1
RAREBB.006b	Arthropoda	Chilopoda	Lithobiomorpha	Lithobiidae	Adult	1
RAREBB.006b	Arthropoda	Collembola	Poduromorpha	Neanuridae	Adult	1
RAREBB.006b	Arthropoda	Diplopoda	Julida	Blaniulidae	Adult	1
RAREBB.006b	Arthropoda	Diplopoda	Julida	Julidae	Adult	12
RAREBB.006b	Arthropoda	Diplopoda			Adult	1
RAREBB.006b	Arthropoda	Insecta	Coleoptera	Ptiliidae	Adult	1
RAREBB.006b	Arthropoda	Insecta	Coleoptera	Tenebrionidae	Immature	1
RAREBB.006b	Arthropoda	Insecta	Mecoptera	Panorpidae	Adult	1
RAREBB.006b	Arthropoda	Malacostraca	Isopoda	Trichoniscidae	Adult	1
RAREBB.012b	Arthropoda	Arachnida	Sarcoptiformes	Euzetidae	Adult	4
RAREBB.012b	Arthropoda	Arachnida	Sarcoptiformes	Galumnidae	Adult	3
RAREBB.012b	Arthropoda	Arachnida	Sarcoptiformes	Scheloribatidae	Adult	1
RAREBB.012b	Arthropoda	Arachnida	Trombidiformes	Eupodidae	Adult	1
RAREBB.012b	Arthropoda	Diplopoda	Julida	Julidae	Adult	1
RAREBB.012b	Arthropoda	Insecta	Coleoptera	Curculionidae	Adult	1
RAREBB.012b	Arthropoda	Insecta	Coleoptera	Lampyridae	Immature	1
RAREBB.012b	Arthropoda	Insecta	Coleoptera	Staphylinidae	Adult	2
RAREBB.012b	Arthropoda	Insecta	Hymenoptera	Formicidae	Adult	6
RAREBB.016b	Arthropoda	Arachnida	Mesostigmata	Pachylaelapidae	Adult	1
RAREBB.016b	Arthropoda	Arachnida	Mesostigmata	Parasitidae	Adult	3
RAREBB.016b	Arthropoda	Arachnida	Mesostigmata	Veigaiidae	Adult	1
RAREBB.016b	Arthropoda	Arachnida	Mesostigmata		Immature	1
RAREBB.016b	Arthropoda	Arachnida	Pseudoscorpiones	Neobisiidae	Adult	1
RAREBB.016b	Arthropoda	Arachnida	Sarcoptiformes	Achipteriidae	Adult	10
RAREBB.016b	Arthropoda	Arachnida	Sarcoptiformes	Euphthiracaridae	Adult	1
RAREBB.016b	Arthropoda	Arachnida	Sarcoptiformes	Euzetidae	Adult	2
RAREBB.016b	Arthropoda	Arachnida	Sarcoptiformes	Galumnidae	Adult	13
RAREBB.016b	Arthropoda	Arachnida	Sarcoptiformes	Gustaviidae	Adult	2
RAREBB.016b	Arthropoda	Arachnida	Sarcoptiformes	Haplozetidae	Adult	4
RAREBB.016b	Arthropoda	Arachnida	Sarcoptiformes	Hypochthoniidae	Adult	1
RAREBB.016b	Arthropoda	Arachnida	Sarcoptiformes	Oppiidae	Adult	1
RAREBB.016b	Arthropoda	Arachnida	Sarcoptiformes	Phthiracaridae	Adult	3
RAREBB.016b	Arthropoda	Arachnida	Sarcoptiformes		Immature	14
RAREBB.016b	Arthropoda	Arachnida	Trombidiformes	Rhagidiidae	Adult	1
RAREBB.016b	Arthropoda	Collembola	Entomobryomorpha	Isotomidae	Adult	1
RAREBB.016b	Arthropoda	Collembola	Poduromorpha	Tullbergiidae	Adult	3
RAREBB.016b	Arthropoda	Diplopoda	Julida	Julidae	Adult	3
RAREBB.016b	Arthropoda	Insecta	Coleoptera	Curculionidae	Immature	2
RAREBB.016b	Arthropoda	Insecta	Coleoptera		Immature	3
RAREBB.016b	Arthropoda	Insecta	Diptera	Phoridae	Adult	1
RAREBB.016b	Arthropoda	Insecta	Diptera	Sciaridae	Adult	1
RAREBB.016b	Mollusca	Gastropoda	Stylommatophora	Arionidae	Adult	1
